# Supplementary material for: Pangenome analyses of the wheat pathogen Zymoseptoria tritici reveal the structural basis of a highly plastic eukaryotic genome
Source: PubMed Central journal article supplement (PMC5765654; doi:10.1186/s12915-017-0457-4), 2018-01-11
Supplement: 12915_2017_457_MOESM1_ESM.pdf [file 12915_2017_457_MOESM1_ESM.pdf]

**Table S1 : Chromosomal length variation among the five completely assembled genomes of *Zymoseptoria tritici*.** The isolate 1E4 is missing the accessory chromosome 17 and the isolate 3D7 is missing the accessory chromosomes 14, 15, 18 and 21.

| Chromosome | Length (kb) |          |          |          |          | % length variation |
|------------|-------------|----------|----------|----------|----------|--------------------|
|            | IPO323      | 1A5      | 1E4      | 3D1      | 3D7      |                    |
| 1          | 6088.8      | 6088.5   | 6061.5   | 6345.1   | 6435.9   | 2.8                |
| 2          | 3860.1      | 3698.7   | 3718.6   | 3863.2   | 3819.1   | 2.1                |
| 3          | 3505.4      | 3797.1   | 3715.7   | 3655.3   | 3904.1   | 4.0                |
| 4          | 2880.0      | 2948.4   | 2972.7   | 3066.4   | 2933.1   | 2.3                |
| 5          | 2861.8      | 2700.1   | 2763.3   | 3035.5   | 2781.6   | 4.6                |
| 6          | 2675.0      | 2700.9   | 2505.7   | 2506.1   | 2415.2   | 4.8                |
| 7          | 2665.3      | 2582.1   | 2654.6   | 2793.4   | 2824.7   | 3.8                |
| 8          | 2443.6      | 2263.1   | 2208.4   | 2353.0   | 2447.9   | 4.6                |
| 9          | 2142.5      | 2048.9   | 2161.7   | 2230.2   | 2020.4   | 4.0                |
| 10         | 1682.6      | 1753.5   | 1847.5   | 1841.8   | 1846.0   | 4.1                |
| 11         | 1624.3      | 1720.0   | 1548.2   | 1659.1   | 1663.2   | 3.8                |
| 12         | 1462.6      | 1468.5   | 1471.3   | 1546.8   | 1367.7   | 4.4                |
| 13         | 1185.8      | 1197.7   | 1157.6   | 1073.5   | 1127.2   | 4.3                |
| 14         | 773.1       | 677.9    | 550.9    | 424.5    | -        | 25.0               |
| 15         | 639.5       | 653.7    | 658.4    | 804.9    | -        | 11.3               |
| 16         | 607.0       | 611.9    | 555.8    | 563.0    | 624.8    | 5.2                |
| 17         | 584.1       | 582.6    | -        | 597.3    | 578.8    | 1.4                |
| 18         | 573.7       | 644.6    | 649.1    | 690.7    | -        | 7.6                |
| 19         | 549.8       | 637.6    | 599.0    | 571.2    | 596.8    | 5.6                |
| 20         | 472.1       | 548.9    | 462.0    | 546.0    | 474.9    | 8.6                |
| 21         | 409.2       | 374.2    | 366.6    | 490.4    | -        | 13.8               |
| Total      | 39 686.3    | 39 698.7 | 38 628.4 | 40 657.5 | 37 861.4 | 2.8                |
