# Supplementary material for: Pangenome analyses of the wheat pathogen Zymoseptoria tritici reveal the structural basis of a highly plastic eukaryotic genome
Source: PubMed Central journal article supplement (PMC5765654; doi:10.1186/s12915-017-0457-4), 2018-01-11
Supplement: 12915_2017_457_MOESM2_ESM.pdf [file 12915_2017_457_MOESM2_ESM.pdf]

**Table S2: Assessment of genome and annotation completeness using BUSCO.** The total number of Ascomycota BUSCO groups searched was 1315.

| <b>Isolate</b>                  | <b>IPO323</b> | <b>1A5</b> | <b>1E4</b> | <b>3D1</b> | <b>3D7</b> |
|---------------------------------|---------------|------------|------------|------------|------------|
| <b>Complete</b>                 | 1287          | 1292       | 1290       | 1294       | 1273       |
| <b>Complete (%)</b>             | 97.9          | 98.3       | 98.1       | 98.5       | 96.8       |
| <b>Complete and single-copy</b> | 1286          | 1291       | 1289       | 1292       | 1272       |
| <b>Complete and duplicated</b>  | 1             | 1          | 1          | 2          | 1          |
| <b>Fragmented</b>               | 11            | 13         | 12         | 12         | 27         |
| <b>Missing</b>                  | 17            | 10         | 13         | 9          | 15         |
