# Supplementary material for: Pangenome analyses of the wheat pathogen Zymoseptoria tritici reveal the structural basis of a highly plastic eukaryotic genome
Source: PubMed Central journal article supplement (PMC5765654; doi:10.1186/s12915-017-0457-4), 2018-01-11

### Singleton genes

$-\log_{10}(p\text{-value})$

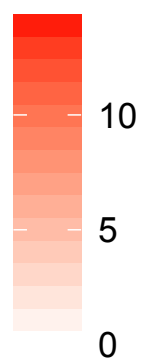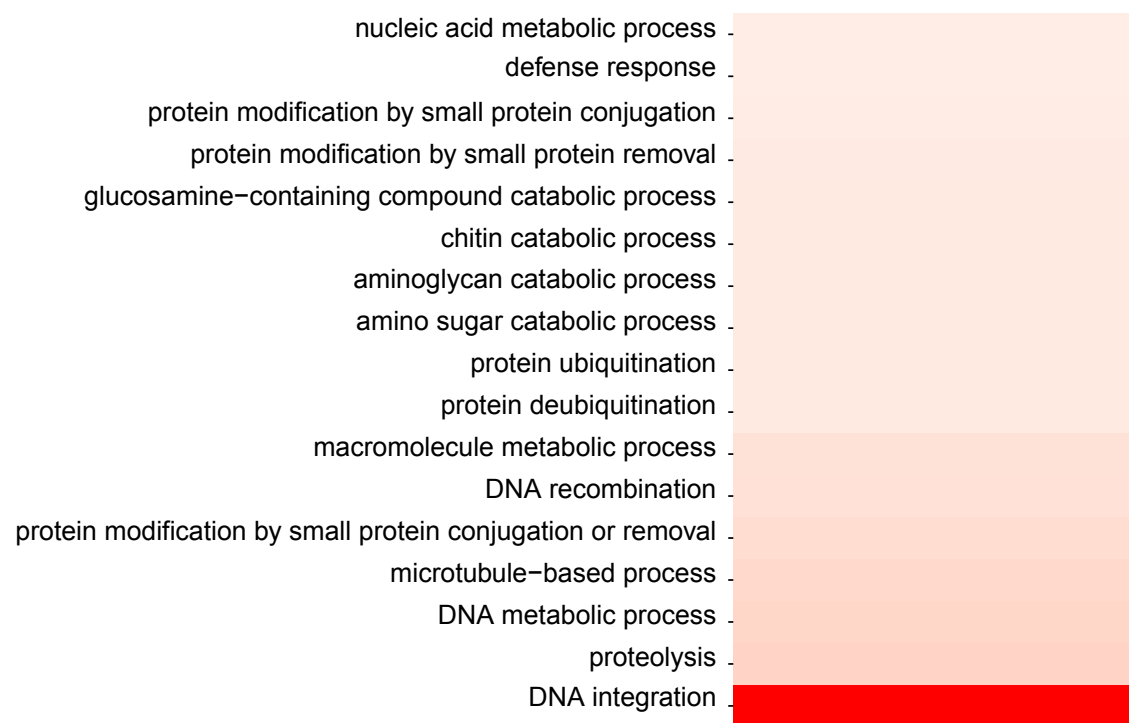

### Core genes

$-\log_{10}(p\text{-value})$

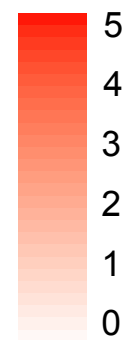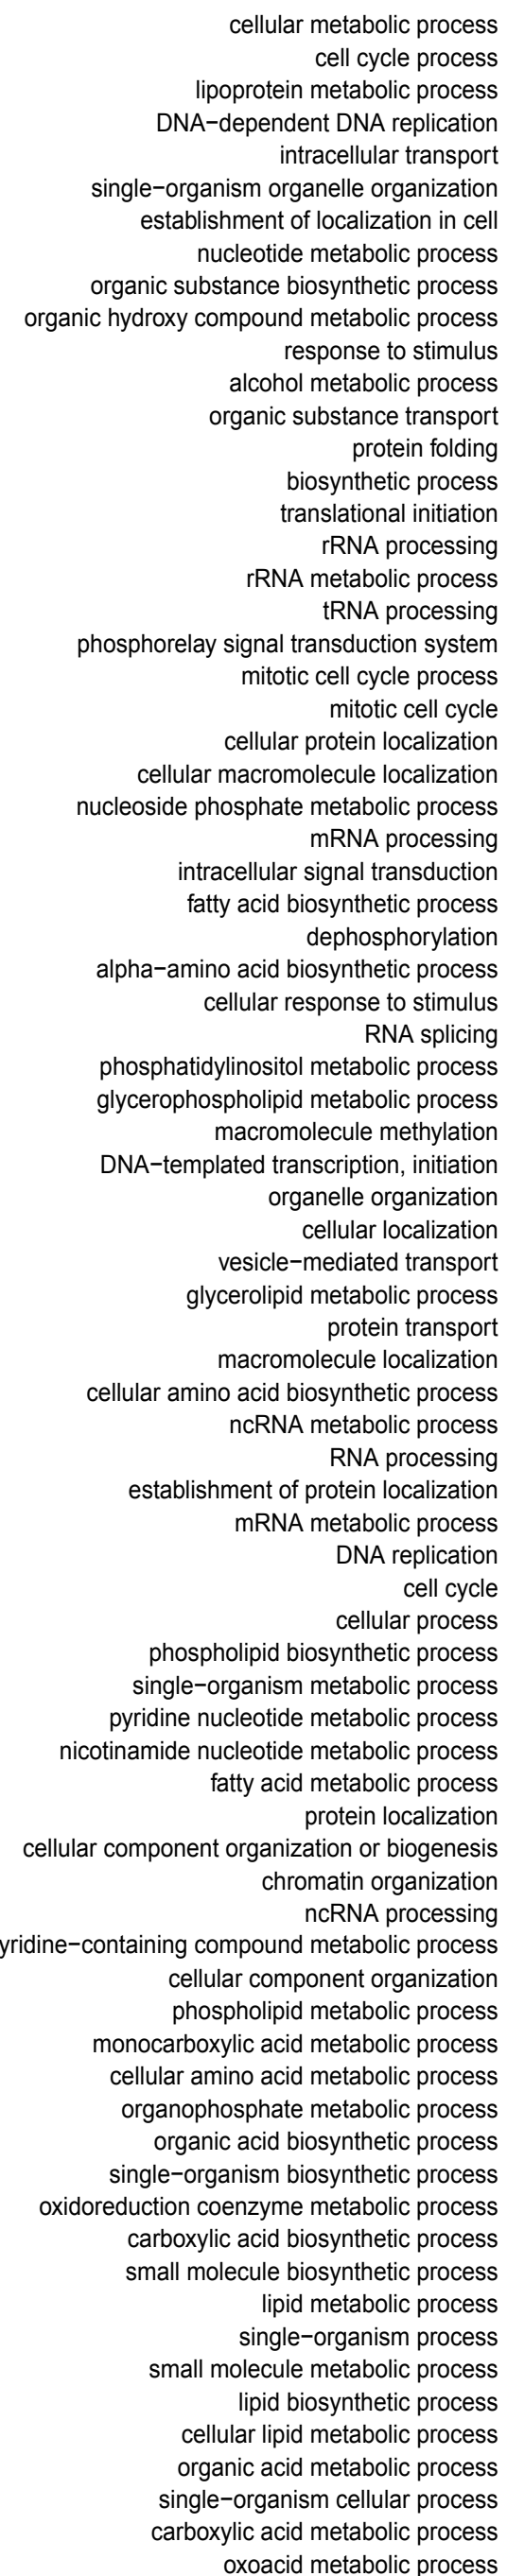

### Accessory genes

$-\log_{10}(p\text{-value})$

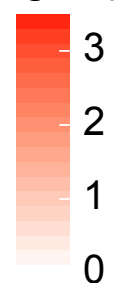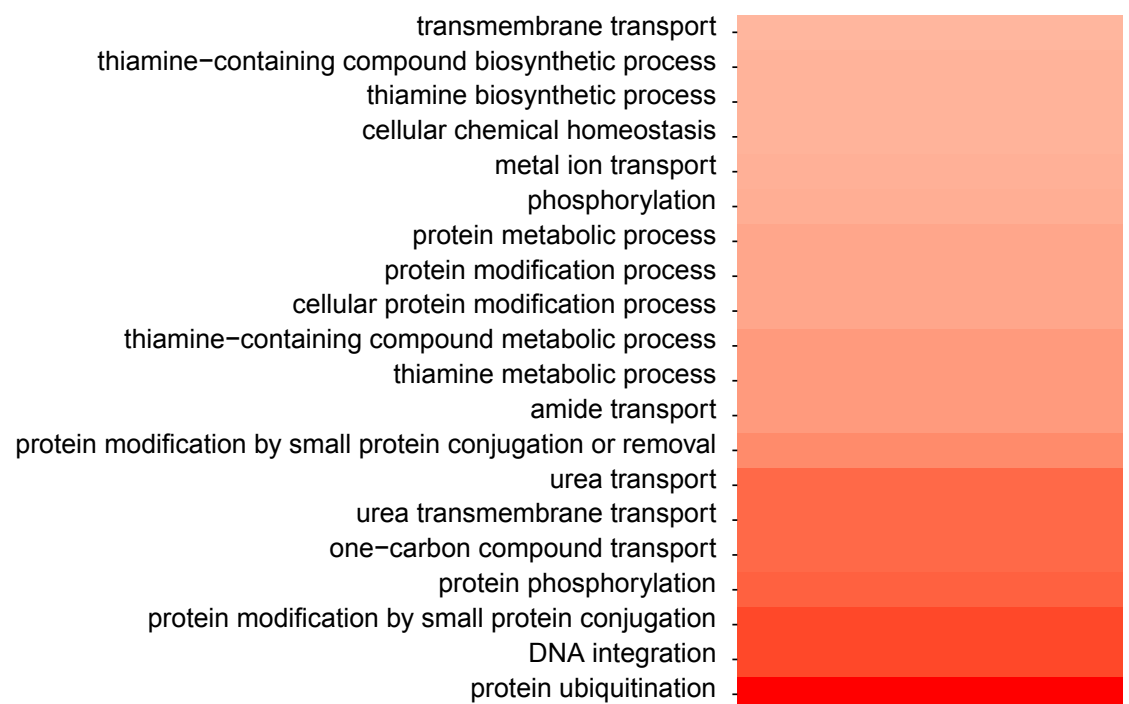

Supplement: 12915_2017_457_MOESM9_ESM.pdf [file 12915_2017_457_MOESM9_ESM.pdf]
